# Supplementary material
Source: MDPI journal article supplement (https://www.mdpi.com/2076-3417/9/18/3711)
Supplement: s1 [file s1]

## Supplementary data

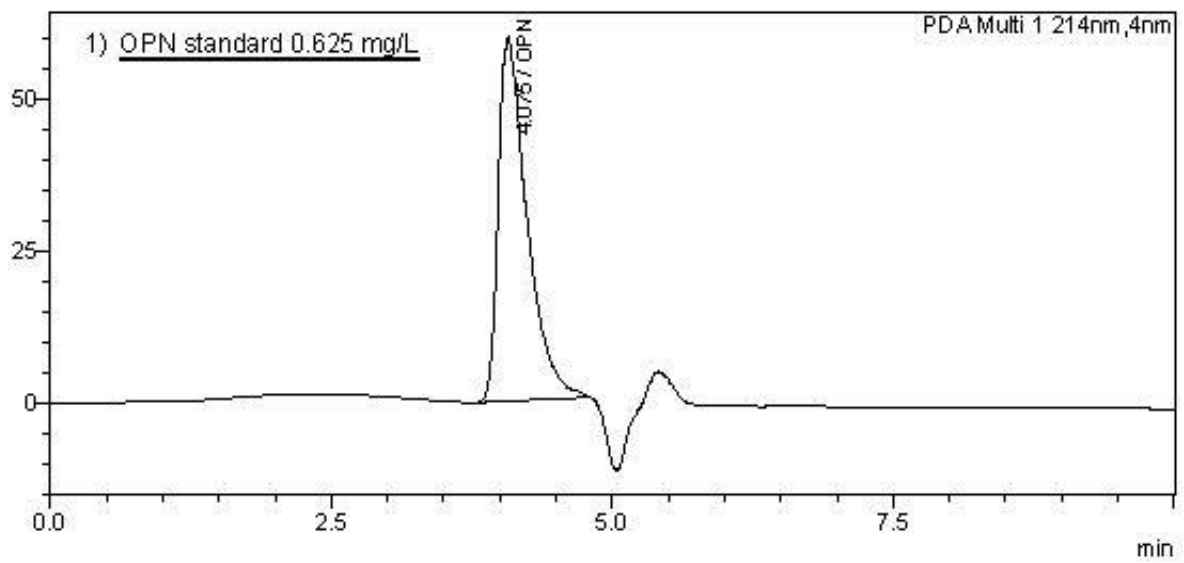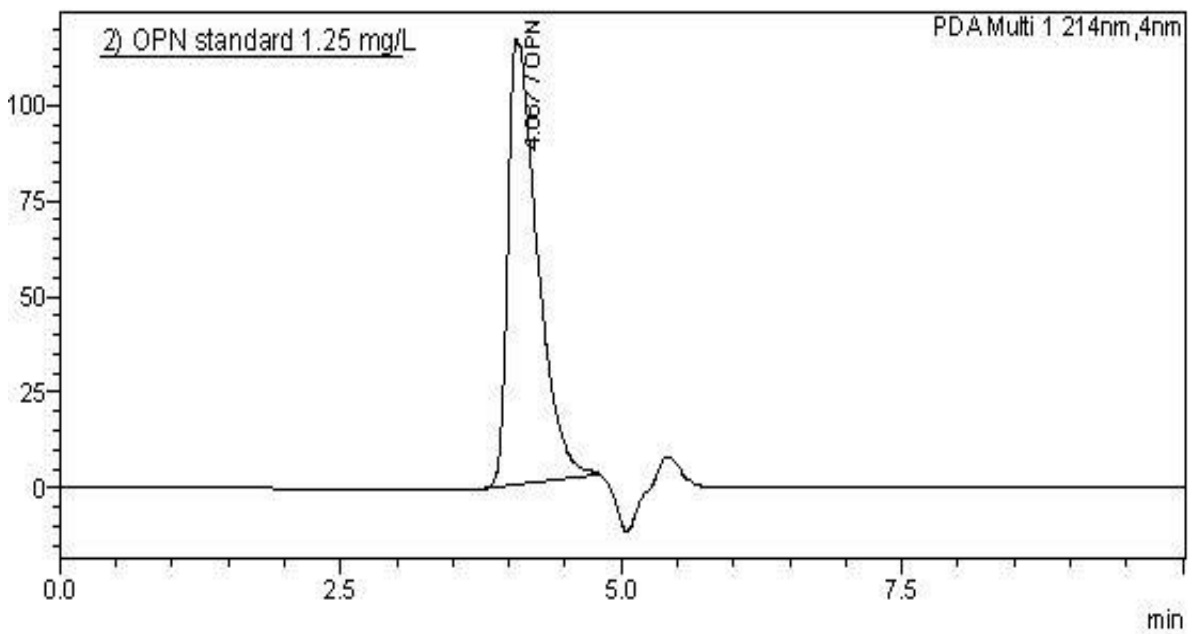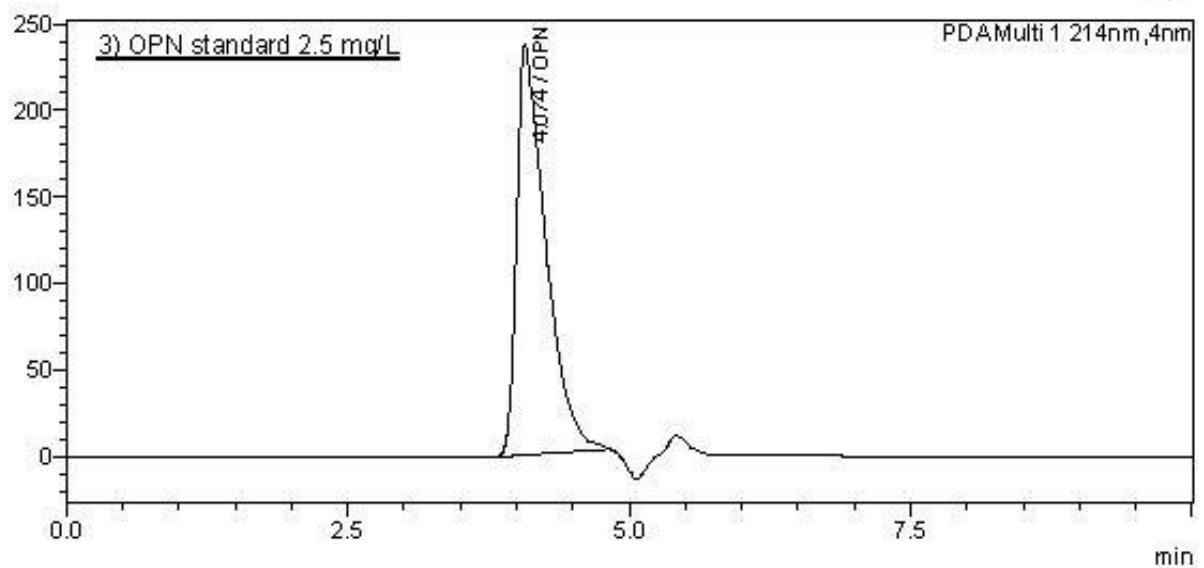

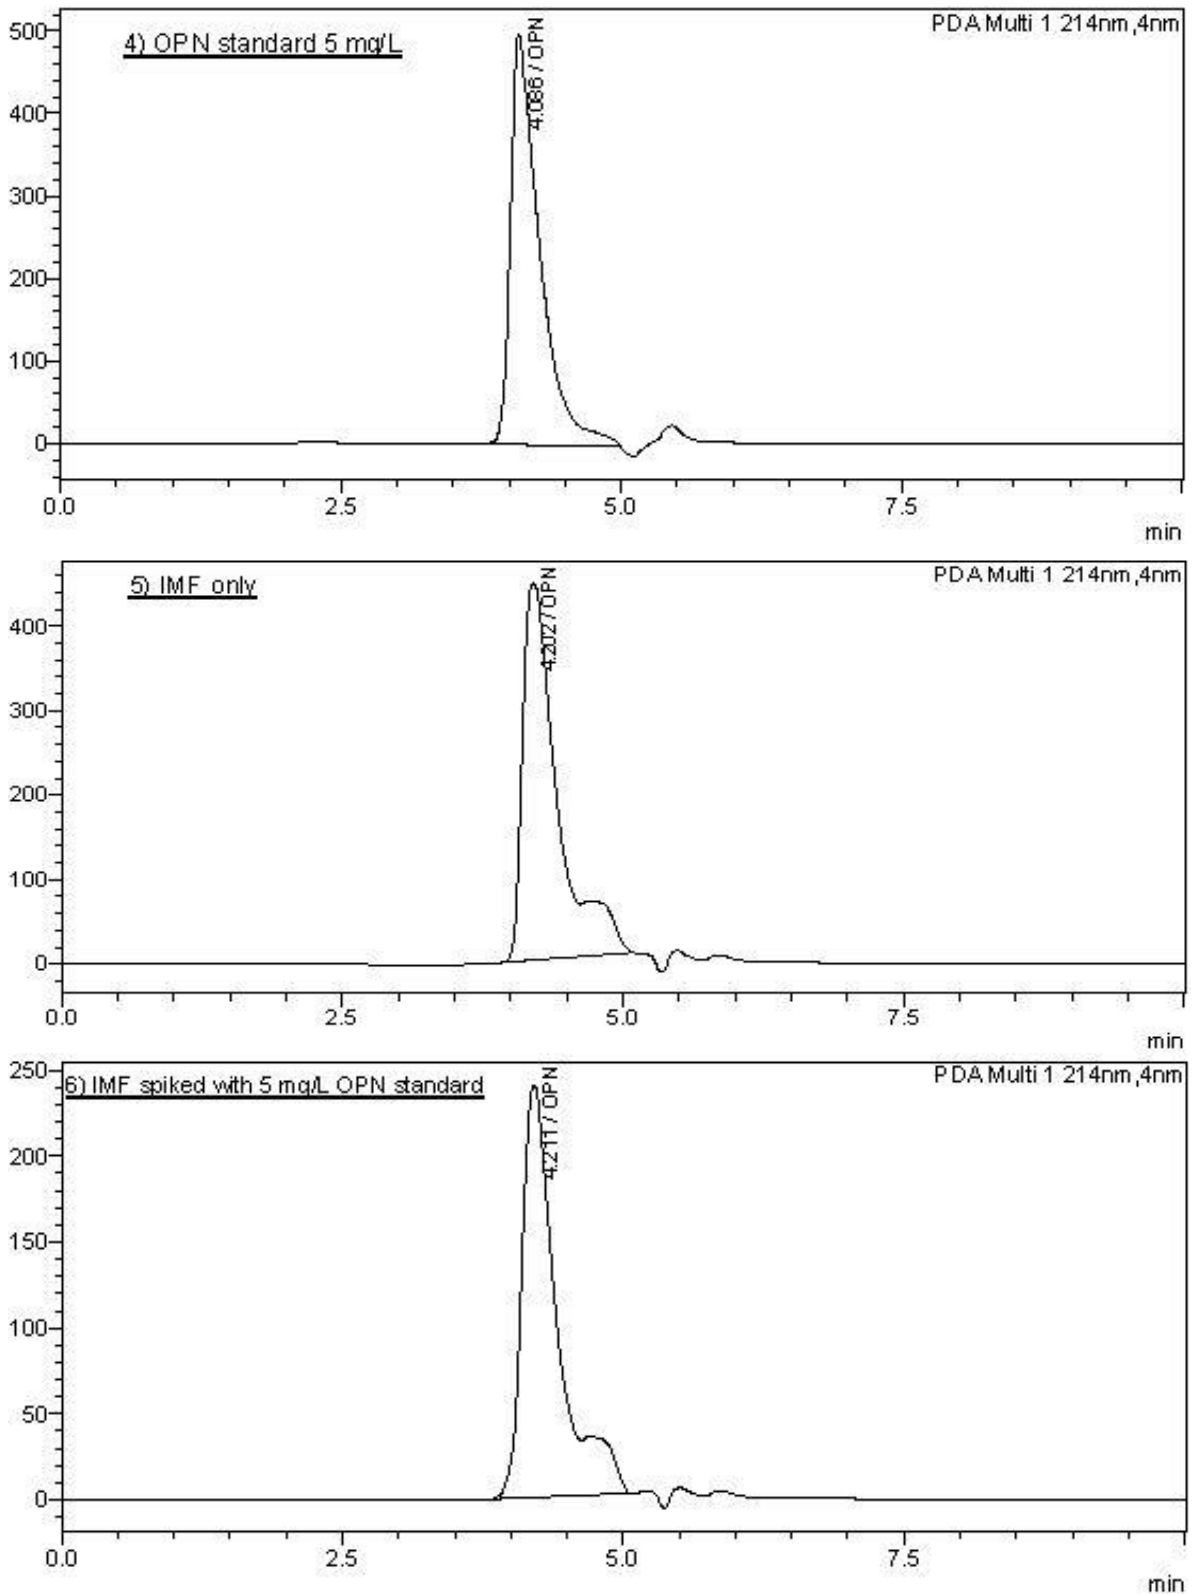

**Figure S1.** Chromatogram of OPN from RP-HPLC analysis: 1) OPN standard 0.625 mg/L, 2) OPN standard 1.25 mg/L, 3) OPN standard 2.5 mg/L, 4) OPN standard 5 mg/L, 5) IMF only and 6) IMF spiked with 5 mg/L OPN standard.

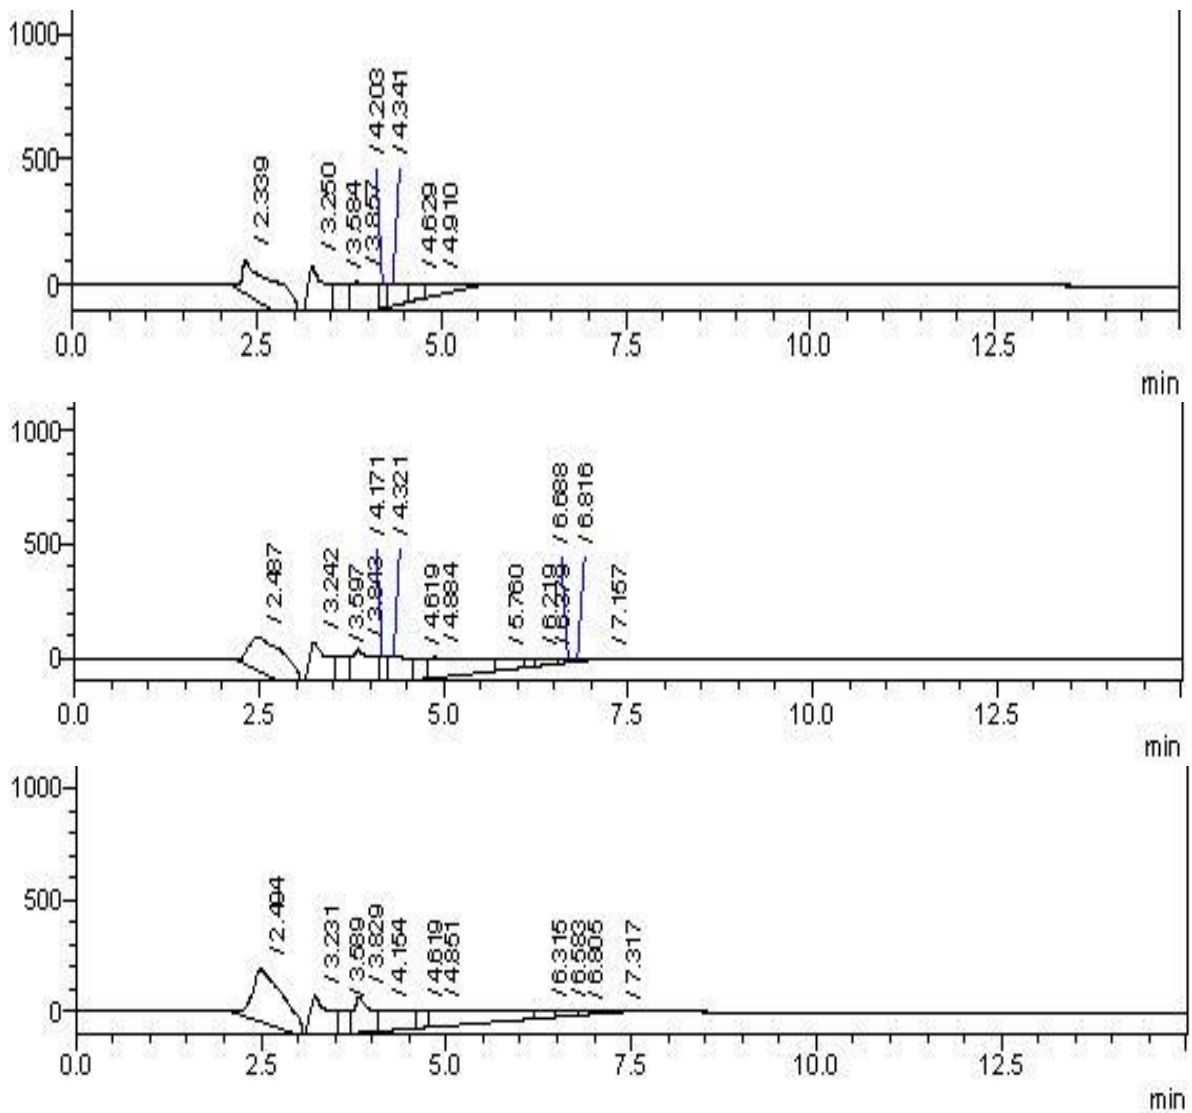

**Figure S2.** Chromatogram of OPN (5 mg/L) in triplicate obtained from RP-HPLC analysis maintaining column temperature at 20 °C. .

## RP-HPLC method robustness

**Table S1.** Robustness of RP-HPLC method after changing column temperature and flow rate, one at a time. .

| Injection of<br>OPN standard<br>(1 mg/L) | Retention time (min),<br>flow rate as 0.3 ml/min<br>and column temperature | Retention time (min),<br>flow rate as 0.3 ml/min<br>and column temperature | Retention time (min),<br>flow rate as 0.15 ml/min<br>and column temperature |
|------------------------------------------|----------------------------------------------------------------------------|----------------------------------------------------------------------------|-----------------------------------------------------------------------------|
|                                          | as 40 °C                                                                   | as 30 °C                                                                   | as 40 °C                                                                    |
| 1                                        | 4.059                                                                      | 4.057                                                                      | 4.076                                                                       |
| 2                                        | 4.060                                                                      | 4.053                                                                      | 4.063                                                                       |
| 3                                        | 4.056                                                                      | 4.061                                                                      | 4.064                                                                       |
| 4                                        | 4.050                                                                      | 4.061                                                                      | 4.067                                                                       |
| 5                                        | 4.071                                                                      | 4.066                                                                      | 4.071                                                                       |
| 6                                        | 4.052                                                                      | 4.043                                                                      | 4.061                                                                       |
| 7                                        | 4.049                                                                      | 4.051                                                                      | 4.065                                                                       |
| 8                                        | 4.058                                                                      | 4.049                                                                      | 4.061                                                                       |
| 9                                        | 4.063                                                                      | 4.057                                                                      | 4.060                                                                       |
| 10                                       | 4.057                                                                      | 4.047                                                                      | 4.075                                                                       |
| Mean                                     | 4.058                                                                      | 4.055                                                                      | 4.066                                                                       |
| SD                                       | 0.0065192                                                                  | 0.007169                                                                   | 0.0058319                                                                   |
| P-value                                  |                                                                            | 0.340522                                                                   | 0.0051693                                                                   |
